# Supplementary material
Source: PubMed Central journal article supplement (PMC7978000)
Supplement: ryct190159suppa1.pdf [file ryct190159suppa1.pdf]

## Equations

$$x = \text{PFN count estimate in non-lung cancer participants} = \frac{(a-b+c)(1-d)e_{\text{reader}}}{f}$$

$$y = \text{PFN count estimate in lung cancer participants} = (g-h+i)(1-j)k_{\text{reader}}$$

$$\text{Lung cancer misclassification rate estimate} = \frac{y}{x+y}$$

### Equation E1: NLST CT cohort lung cancer PFN misclassification rate estimate.

a = Number of eligible benign nodules = 732

b = Number of eligible benign nodules in scans which could not be processed = 3

c = Number of noncalcified solid nodules < 10 mm in the random sample of participants without lung cancer = 526

d = Post hoc benign nodule exclusion proportion = 32/246

$e_{\text{reader}}$  = PFN proportion of benign nodules found in observer study by individual readers = 102/246 (lowest) to 185/246 (highest)

f = Proportion of randomly selected nonlung cancer participants from the population ( $\leq 2$  mm slice thickness scans) = 5439/(26722–1089)

g = Number of eligible cancer nodules = 84

h = Number of eligible cancer nodules in scans which could not be processed = 3

i = Number of noncalcified solid lung cancer nodules < 5 mm = 13

j = Post hoc cancer exclusion proportion = 11/81

$k_{\text{reader}}$  = Proportion of lung cancers misclassified as PFNs by individual readers = 0/70 (lowest) to 8/70 (highest)

Note.—To estimate the NLST CT cohort lung cancer misclassification rate, it was assumed that noneligible solid cancer nodules < 5 mm ( $n = 13$ ) would have the same error rates and that the remaining noneligible cancers > 10 mm would never be classified as PFNs ( $n = 226$ ). 26722 participants were part of the NLST CT cohort, of which 1089 were diagnosed with cancer; the random sample of participants without lung cancer considered for this study was 21% of the total CT cohort (5439/(26722–1089)). It was estimated that the proportion of cancers diagnosed among nodules classified as PFNs in the NLST CT cohort would range from 0% to 0.43%.

$$y = \text{PFN count estimate in lung cancer participants} = (g - h + i)(1 - j)k_{\text{reader}}$$

$$z = \text{Total number of nodules estimate} = \frac{1}{f} + m$$

$$\text{PFN prevalence estimate} = \frac{x + y}{z}$$

## Equation E2: NLST CT cohort PFN prevalence estimate among noncalcified nodules.

a = Number of eligible benign nodules = 732

b = Number of eligible benign nodules in scans which could not be processed = 3

c = Number of noncalcified solid nodules < 5 mm in the random sample of participants without lung cancer = 526

d = Post hoc benign nodule exclusion proportion = 32/246

$e_{\text{reader}}$  = PFN proportion of benign nodules found in observer study by individual readers = 102/246 (lowest) to 185/246 (highest)

f = Proportion of randomly selected nonlung cancer participants from the population ( $\leq 2$  mm slice thickness scans) = 5439/(26722–1089)

g = Number of eligible cancer nodules = 84

h = Number of eligible cancer nodules in scans which could not be processed = 3

i = Number of noncalcified solid lung cancer nodules < 5 mm = 13

j = Post hoc cancer exclusion proportion = 11/81

$k_{\text{reader}}$  = Proportion of lung cancers misclassified as PFNs by one reader = 0/70 (lowest) to 8/70 (highest)

l = Number of noncalcified nodules in the random sample of participants without lung cancer = 1796

m = Total number of cancer nodules ( $\leq 2$  mm slice thickness scans) = 323

Note.—To estimate the NLST CT cohort prevalence of PFNs, it was assumed that the PFN proportions found in the observer study—varying from 33% (105/316) to 60% (190/316)—can be generalized to the entire sample of noncalcified solid benign nodules between 5 and 10 mm in diameter ( $n = 732$ ) and all ineligible noncalcified solid nodules < 5 mm in diameter ( $n = 526$ ), and that the remaining ineligible noncalcified nodules would never be classified as PFNs ( $n = 539$ ). It was estimated that the prevalence of PFNs in the NLST would range between 24% and 44% among all noncalcified nodules.

**Table E1: Summary of multicase studies with CT-pathologic correlation of intrapulmonary lymph nodes.**

| Study                     | No. subjects | No. IPLNs | Max. Diameter range | Middle/ lower lobe location (%) | Pleura attachment (%)* | Max. pleural distance (mm)* | Solid nodule (%) | Round shape (%) | Oval shape (%) | polygonal shape (%) | Sharp margins (%) | Linear densities (%)   |
|---------------------------|--------------|-----------|---------------------|---------------------------------|------------------------|-----------------------------|------------------|-----------------|----------------|---------------------|-------------------|------------------------|
| Barnett et al, 2019 (1)   | 48           | 62        | ≤15 <sup>  </sup>   | 48 (77.4)                       | 24 (38.7)              | >10 <sup>†</sup>            | 62 (100)         | 6 (9.7)         | —              | —                   | 61 (98.4)         | 59 (95.1) <sup>¥</sup> |
| Kawaguchi et al, 2018 (2) | 20           | 26        | 2.6 to 10.8         | 25 (96.2)                       | 14 (53.8)              | 18                          | 26               | 0 (0)           | 7 (26.9)       | 19 (73.1)           | 26 (100)          | 3 (11.5) §             |
| Wang et al, 2013 (3)      | 26           | 31        | 3.4 to 9.1          | 30 (96.8)                       | 25 (80.6)              | 8                           | 30 (96.8)        | 4 (12.9)        | 0 (0)          | 27 (87.1)           | 31 (100)          | 31 (100)               |
| Ishikawa et al, 2007 (4)  | 7            | 14        | 3 to 6              | 6 (42.9)                        | 3 (21.4)               | >15 <sup>‡</sup>            | 13 (92.9)        | 1 (7.1)         | 2 (14.3)       | 11 (78.6)           | 13 (92.9)         | 11 (78.6)              |
| Hyodo et al, 2004 (5)     | 10           | 11        | 3 to 9              | 11 (100)                        | 3 (27.3)               | 12                          | 11 (100)         | 3 (27.3)        | 0 (0)          | 8 (72.7)            | 11 (100)          | 9 (81.8)               |
| Oshiro et al, 2002 (6)    | 16           | 19        | 5 to 12             | 19 (100)                        | 10 (52.6)              | 8                           | 19 (100)         | 9 (47.4)        | 10 (52.6)      | 0 (0)               | 18 (94.7)         | 1 (5.3)                |
| Sykes et al, 2002 (7)     | 41           | 57        | 2 to 10             | 46 (80.7)                       | 26 (45.6)              | 22                          | -(-)             | 19 (33.3)       | 38 (66.7)      | 0 (0)               | —                 | 43 (75.4)              |
| Matsuki et al, 2001 (8)   | 14           | 18        | 4 to 15             | 18 (100)                        | 15 (83.3)              | 15                          | -(-)             | 8 (44.4)        | 9 (50)         | 0 (0)               | 18 (100)          | —                      |
| Miyake et al, 1999 (9)    | 4            | 4         | 9 to 10             | 4 (100)                         | 1 (25.0)               | 3                           | 4 (100)          | 3 (75.0)        | 1 (25.0)       | 0 (0)               | 4 (100)           | —                      |
| Yokomise et al, 1998 (10) | 12           | 12        | 3 to 10             | 11 (91.7)                       | 9 (75.0)               | 5                           | —                | —               | —              | —                   | 11 (91.7)         | —                      |
| Bankoff et al, 1996 (11)  | 17           | 17        | 4 to 12             | 17 (100)                        | 0 (0)                  | 20                          | 17 (100)         | —               | —              | —                   | —                 | —                      |
| Kradin et al, 1985 (12)   | 10           | 16        | 4 to 10             | 12 (75.0)                       | —                      | —                           | 16 (100)         | 5 (31.3)        | 6 (37.5)       | 5 (31.3)            | —                 | —                      |
| <b>Pooled results</b>     | 225          | 287       | 2 to 15             | 247 (86.1)                      | 130 (48.0)             | 22                          | 198 (99.0)       | 58 (22.5)       | 73 (28.3)      | 70 (27.1)           | 193 (98.0)        | 157 (71.4)             |

Note.—Typical CT features of IPLNs are a diameter less than 15 mm, a distance within 20 mm of the pleura, solid consistency, and sharp margins; most are located in the middle or lower lobes and display extending linear densities. IPLNs shapes can be categorized into three similarly sized groups: round, oval, or angular/polygonal. *IPLN* = intrapulmonary lymph node.

\* Unspecified whether fissures were considered to be part of the pleura or not.

<sup>||</sup> One IPLN was excluded from the study for having a diameter ≥ 15 mm. The range was not reported; the diameters had a mean and standard deviation of 5.4 and 1.7 mm, respectively.

<sup>†</sup> 88.7% (55/62) were < 10 mm from the pleura

<sup>‡</sup> One of 14 nodules (7.1%) was located greater than 15 mm from the pleura, but an exact distance was not reported.

<sup>¥</sup> Described as vessels originating or terminating from the nodule. All vessels attached to IPLNs were veins; one IPLN was attached to both a vein and an artery.

§ Only linear densities continuous to the pleura were reported.

## References

1. Barnett J, Pulzato I, Wilson R, Padley S, Nicholson AG, Devaraj A. Perinodular Vascularity Distinguishes Benign Intrapulmonary Lymph Nodes From Lung Cancer on Computed Tomography. *J Thorac Imaging* 2019;34(5):326–328.
2. Kawaguchi T, Sawabata N, Nakai T, et al. Clinical and pathological characteristics of surgically resected intrapulmonary lymph nodes: Can they be differentiated from other malignant nodules? *Respir Investig* 2018;56(6):473–479.
3. Wang CW, Teng YH, Huang CC, Wu YC, Chao YK, Wu CT. Intrapulmonary lymph nodes: computed tomography findings with histopathologic correlations. *Clin Imaging* 2013;37(3):487–492.
4. Ishikawa H, Koizumi N, Morita T, Tsuchida M, Umezu H, Sasai K. Ultrasmall intrapulmonary lymph node: usual high-resolution computed tomographic findings with histopathologic correlation. *J Comput Assist Tomogr* 2007;31(3):409–413.
5. Hyodo T, Kanazawa S, Dendo S, et al. Intrapulmonary lymph nodes: thin-section CT findings, pathological findings, and CT differential diagnosis from pulmonary metastatic nodules. *Acta Med Okayama* 2004;58(5):235–240.
6. Oshiro Y, Kusumoto M, Moriyama N, et al. Intrapulmonary lymph nodes: thin-section CT features of 19 nodules. *J Comput Assist Tomogr* 2002;26(4):553–557.
7. Sykes AM, Swensen SJ, Tazelaar HD, Jung SH. Computed tomography of benign intrapulmonary lymph nodes: retrospective comparison with sarcoma metastases. *Mayo Clin Proc* 2002;77(4):329–333.
8. Matsuki M, Noma S, Kuroda Y, Oida K, Shindo T, Kobashi Y. Thin-section CT features of intrapulmonary lymph nodes. *J Comput Assist Tomogr* 2001;25(5):753–756.
9. Miyake H, Yamada Y, Kawagoe T, Hori Y, Mori H, Yokoyama S. Intrapulmonary lymph nodes: CT and pathological features. *Clin Radiol* 1999;54(10):640–643.
10. Yokomise H, Mizuno H, Ike O, Wada H, Hitomi S, Itoh H. Importance of intrapulmonary lymph nodes in the differential diagnosis of small pulmonary nodular shadows. *Chest* 1998;113(3):703–706.
11. Bankoff MS, McEniff NJ, Bhadelia RA, Garcia-Moliner M, Daly BD. Prevalence of pathologically proven intrapulmonary lymph nodes and their appearance on CT. *AJR Am J Roentgenol* 1996;167(3):629–630.

12. Kradin RL, Spirn PW, Mark EJ. Intrapulmonary lymph nodes. Clinical, radiologic, and pathologic features. *Chest* 1985;87(5):662–667.
